# Supplementary material
Source: PubMed Central journal article supplement (PMC3008311)
Supplement: NIHMS242816-supplement-01.pdf [file NIHMS242816-supplement-01.pdf]

## Appendix a

| <b>Subject #</b> | <b>Age (years)</b> | <b>gender</b> | <b>Gestational age (weeks)</b> | <b>Diagnosis</b>     |
|------------------|--------------------|---------------|--------------------------------|----------------------|
| 1                | 5.7                | male          | 28                             | Spastic diplegia     |
| 2                | 4.4                | female        | 24                             | Spastic diplegia     |
| 3                | 5.9                | male          | 30                             | Spastic diplegia     |
| 4                | 6.6                | male          | 29                             | Spastic quadriplegia |
| 5                | 7                  | female        | 29                             | Spastic diplegia     |
| 6                | 8.5                | female        | 32                             | Spastic diplegia     |
| 7                | 13.2               | female        | 34                             | Hemiplegia           |
| 8                | 4.1                | male          | 31                             | Spastic diplegia     |
| 9                | 4                  | male          | 27                             | Spastic diplegia     |
| 10               | 4.3                | male          | 23                             | Spastic diplegia     |
| 11               | 4.9                | male          | 26                             | Spastic diplegia     |
| 12               | 8                  | male          | 26                             | Spastic diplegia     |
| 13               | 6.3                | female        | 26                             | Spastic diplegia     |
