# Supplementary material
Source: PubMed Central journal article supplement (PMC3008311)
Supplement: NIHMS242816-supplement-02.pdf [file NIHMS242816-supplement-02.pdf]

## Appendix b

|                    | Overall                            |             |             | Anterior Limb of Internal Capsule |             |             | External capsule |             |             |
|--------------------|------------------------------------|-------------|-------------|-----------------------------------|-------------|-------------|------------------|-------------|-------------|
| Accuracy           | Auto vs. Manual                    | Intra-rater | Inter-rater | Auto vs. Manual                   | Intra-rater | Inter-rater | Auto vs. Manual  | Intra-rater | Inter-rater |
| <b>Kappa</b>       | 0.797±0.071                        | 0.892±0.027 | 0.833±0.069 | 0.842±0.028                       | 0.901±0.015 | 0.869±0.026 | 0.808±0.036      | 0.880±0.020 | 0.837±0.042 |
| <b>Sensitivity</b> | 0.821±0.084                        | 0.879±0.048 | 0.864±0.081 | 0.832±0.032                       | 0.878±0.034 | 0.903±0.051 | 0.818±0.079      | 0.877±0.037 | 0.963±0.018 |
| <b>Specificity</b> | 0.998±0.001                        | 0.999±0.000 | 0.998±0.001 | 0.999±0.000                       | 0.999±0.000 | 0.999±0.001 | 0.998±0.001      | 0.999±0.000 | 0.996±0.001 |
| <b>PPV</b>         | 0.789±0.083                        | 0.912±0.037 | 0.822±0.091 | 0.855±0.044                       | 0.927±0.024 | 0.844±0.061 | 0.810±0.044      | 0.888±0.034 | 0.746±0.068 |
| <b>NPV</b>         | 0.998±0.001                        | 0.999±0.001 | 0.999±0.001 | 0.999±0.000                       | 0.999±0.000 | 0.999±0.000 | 0.998±0.001      | 0.999±0.001 | 1.000±0.000 |
| <b>FPR</b>         | 0.002±0.001                        | 0.001±0.000 | 0.002±0.001 | 0.001±0.000                       | 0.001±0.000 | 0.001±0.001 | 0.002±0.001      | 0.001±0.000 | 0.004±0.001 |
| <b>FNR</b>         | 0.179±0.084                        | 0.121±0.048 | 0.136±0.081 | 0.168±0.032                       | 0.122±0.034 | 0.097±0.051 | 0.182±0.079      | 0.123±0.037 | 0.037±0.018 |
| <b>Jaccard</b>     | 0.678±0.085                        | 0.809±0.042 | 0.731±0.083 | 0.729±0.040                       | 0.820±0.024 | 0.771±0.040 | 0.682±0.049      | 0.788±0.032 | 0.724±0.059 |
| <b>Dice</b>        | 0.799±0.070                        | 0.893±0.027 | 0.835±0.069 | 0.843±0.027                       | 0.901±0.014 | 0.870±0.026 | 0.810±0.036      | 0.881±0.019 | 0.839±0.041 |
|                    | Posterior Limb of Internal Capsule |             |             | Putamen                           |             |             | Thalamus         |             |             |
| Accuracy           | Auto vs. Manual                    | Intra-rater | Inter-rater | Auto vs. Manual                   | Intra-rater | Inter-rater | Auto vs. Manual  | Intra-rater | Inter-rater |
| <b>Kappa</b>       | 0.765±0.058                        | 0.896±0.026 | 0.837±0.055 | 0.885±0.022                       | 0.923±0.018 | 0.859±0.035 | 0.871±0.035      | 0.929±0.012 | 0.901±0.023 |
| <b>Sensitivity</b> | 0.818±0.084                        | 0.919±0.036 | 0.953±0.064 | 0.914±0.023                       | 0.927±0.027 | 0.782±0.062 | 0.889±0.046      | 0.920±0.035 | 0.911±0.046 |
| <b>Specificity</b> | 0.998±0.001                        | 0.999±0.000 | 0.998±0.001 | 0.998±0.001                       | 0.999±0.000 | 1.000±0.000 | 0.997±0.002      | 0.999±0.001 | 0.997±0.001 |
| <b>PPV</b>         | 0.725±0.062                        | 0.878±0.051 | 0.755±0.081 | 0.863±0.041                       | 0.922±0.022 | 0.961±0.030 | 0.863±0.055      | 0.944±0.023 | 0.899±0.052 |
| <b>NPV</b>         | 0.999±0.001                        | 0.999±0.000 | 1.000±0.001 | 0.999±0.000                       | 0.999±0.000 | 0.997±0.001 | 0.997±0.001      | 0.998±0.001 | 0.998±0.001 |
| <b>FPR</b>         | 0.002±0.001                        | 0.001±0.000 | 0.002±0.001 | 0.002±0.001                       | 0.001±0.000 | 0.000±0.000 | 0.003±0.002      | 0.001±0.001 | 0.003±0.001 |
| <b>FNR</b>         | 0.182±0.084                        | 0.081±0.036 | 0.047±0.064 | 0.086±0.023                       | 0.073±0.027 | 0.218±0.062 | 0.111±0.046      | 0.080±0.035 | 0.089±0.046 |
| <b>Jaccard</b>     | 0.625±0.077                        | 0.814±0.043 | 0.725±0.078 | 0.798±0.036                       | 0.859±0.030 | 0.757±0.054 | 0.778±0.054      | 0.871±0.020 | 0.824±0.036 |
| <b>Dice</b>        | 0.767±0.057                        | 0.897±0.026 | 0.839±0.054 | 0.887±0.022                       | 0.924±0.017 | 0.861±0.034 | 0.874±0.035      | 0.931±0.011 | 0.903±0.022 |
|                    | Cingulum                           |             |             | Superior Corona Radiata           |             |             | Corpus Callosum  |             |             |
| Accuracy           | Auto vs. Manual                    | Intra-rater | Inter-rater | Auto vs. Manual                   | Intra-rater | Inter-rater | Auto vs. Manual  | Intra-rater | Inter-rater |
| <b>Kappa</b>       | 0.681±0.165                        | 0.882±0.028 | 0.842±0.093 | 0.697±0.178                       | 0.818±0.072 | 0.624±0.259 | 0.831±0.042      | 0.905±0.026 | 0.894±0.023 |
| <b>Sensitivity</b> | 0.721±0.174                        | 0.854±0.054 | 0.849±0.077 | 0.644±0.197                       | 0.791±0.119 | 0.670±0.280 | 0.933±0.040      | 0.864±0.043 | 0.883±0.052 |
| <b>Specificity</b> | 0.999±0.001                        | 1.000±0.000 | 0.999±0.001 | 0.998±0.001                       | 0.999±0.001 | 0.997±0.001 | 0.996±0.001      | 0.999±0.000 | 0.999±0.001 |

|                |             |             |             |             |             |             |             |             |             |
|----------------|-------------|-------------|-------------|-------------|-------------|-------------|-------------|-------------|-------------|
| <b>PPV</b>     | 0.662±0.185 | 0.920±0.066 | 0.869±0.170 | 0.780±0.171 | 0.864±0.068 | 0.593±0.239 | 0.756±0.064 | 0.955±0.011 | 0.912±0.026 |
| <b>NPV</b>     | 0.999±0.000 | 0.999±0.000 | 0.999±0.000 | 0.996±0.002 | 0.998±0.001 | 0.998±0.001 | 0.999±0.001 | 0.998±0.001 | 0.998±0.001 |
| <b>FPR</b>     | 0.001±0.001 | 0.000±0.000 | 0.001±0.001 | 0.002±0.001 | 0.001±0.001 | 0.003±0.001 | 0.004±0.001 | 0.001±0.000 | 0.001±0.001 |
| <b>FNR</b>     | 0.279±0.174 | 0.146±0.054 | 0.151±0.077 | 0.356±0.197 | 0.209±0.119 | 0.330±0.280 | 0.067±0.040 | 0.136±0.043 | 0.117±0.052 |
| <b>Jaccard</b> | 0.537±0.178 | 0.791±0.045 | 0.736±0.119 | 0.560±0.184 | 0.700±0.101 | 0.497±0.237 | 0.716±0.059 | 0.830±0.042 | 0.812±0.037 |
| <b>Dice</b>    | 0.682±0.165 | 0.883±0.028 | 0.842±0.093 | 0.699±0.178 | 0.819±0.072 | 0.627±0.258 | 0.833±0.041 | 0.907±0.025 | 0.896±0.023 |
